# Supplementary material
Source: Springer Nature journal article supplement (https://www.springermedizin.de/resource/supplementary/12891_2012_1415_MOESM1_ESM.pdf/9507838)
Supplement: MOESM1 [file 9507838]

Eligible patients with  
established RA

```
graph TD; A[Eligible patients with established RA] --> B[Randomised to Direct Access group]; A --> C[Randomised to Regular Clinician Initiated Group]; B --> D[Follow up at 12 months]; C --> E[Follow up at 12 months]; E --> F[Enter Direct Access system];
```

Randomised to Direct Access  
group

Follow up at 12 months

Randomised to Regular Clinician  
Initiated Group

Follow up at 12 months

Enter Direct Access system
